# Supplementary material for: Monitoring TRPC7 Conformational Changes by BRET Following GPCR Activation
Source: MDPI journal article supplement (doi:10.3390/ijms23052502), 2022-02-24
Supplement: s1 [file s1]

## Supplementary Information

# Monitoring TRPC7 Conformational Changes by BRET Following GPCR Activation

Cécile Pétigny <sup>1,2,3</sup>, Audrey-Ann Dumont <sup>2,3,4</sup>, Hugo Giguère <sup>2,3,4</sup>, Audrey Collette <sup>1,2,3</sup>, Brian J. Holleran <sup>1,2,3</sup>, Mircea Iftinca <sup>5</sup>, Christophe Altier <sup>5</sup>, Élie Besserer-Offroy <sup>6,7,8</sup>, Mannix Auger-Messier <sup>2,3,4</sup> and Richard Leduc <sup>1,2,3,\*</sup>

- <sup>1</sup> Department of Pharmacology-Physiology, Faculty of Medicine and Health Sciences, Université de Sherbrooke, Sherbrooke, QC J1H 5N4, Canada; cecile.petigny@usherbrooke.ca (C.P.); audrey.collette@usherbrooke.ca (A.C.); brian.holleran@usherbrooke.ca (B.J.H.)
- <sup>2</sup> Institut de Pharmacologie de Sherbrooke, Université de Sherbrooke, Sherbrooke, QC J1H 5N4, Canada
- <sup>3</sup> Centre de recherche du Centre Hospitalier Universitaire de Sherbrooke, Sherbrooke, QC J1H 5N4, Canada
- <sup>4</sup> Department of Medicine, Division of Cardiology, Faculty of Medicine and Health Sciences, Université de Sherbrooke, Sherbrooke, QC J1H 5N4, Canada; audrey-ann.dumont@usherbrooke.ca (A.-A.D.); hugo.giguere@usherbrooke.ca (H.G.); mannix.auger-messier@usherbrooke.ca (M.A.-M.)
- <sup>5</sup> Department of Physiology and Pharmacology, Inflammation Research Network-Snyder Institute for Chronic Diseases and Alberta Children's Hospital Research Institute, University of Calgary, Calgary, AB T2N 1N4, Canada; miftinca@ucalgary.ca (M.I.); altier@ucalgary.ca (C.A.)
- <sup>6</sup> Department of Molecular and Medical Pharmacology, Ahmanson Translational Theranostics Division, David Geffen School of Medicine, University of California-Los Angeles, Los Angeles, CA 90095, USA; ebesserer@ucla.edu (É. B.-O.)
- <sup>7</sup> Jonsson Comprehensive Cancer Center, University of California, Los Angeles, CA 90095, USA
- <sup>8</sup> California NanoSystems Institute, Los Angeles, CA 90095, USA
- \* Correspondence: richard.leduc@usherbrooke.ca (R.L.)

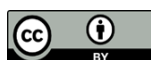

**Copyright:** © 2022 by the authors. Open access publication under the terms and conditions of the Creative Commons Attribution (CC BY) license (<http://creativecommons.org/licenses/by/4.0/>).

## Table of Contents

|                   |         |
|-------------------|---------|
| Table S1 .....    | page S3 |
| Figure S1.....    | page S4 |
| Figure S2.....    | page S5 |
| Sequence S1 ..... | page S6 |
| Sequence S2 ..... | page S8 |

**Table S1:** PCR primers used for TRPC7 amplification.

| Biosensor          | Primer  | DNA sequence                                 |
|--------------------|---------|----------------------------------------------|
| RLUCII-TRPC7-GFP10 | Forward | gagcagggatccgccggtaccATGTTGAGGAACAGCACC      |
|                    | Reverse | tgctcaccatggtggcggaagcttAATGTCTTTGCCCTTGTTTC |
| GFP10-TRPC7-RLUCII | Forward | tacaagggatccgccggtaccATGTTGAGGAACAGCACC      |
|                    | Reverse | tgctggtcatggtggcggaagcttAATGTCTTTGCCCTTGTTTC |

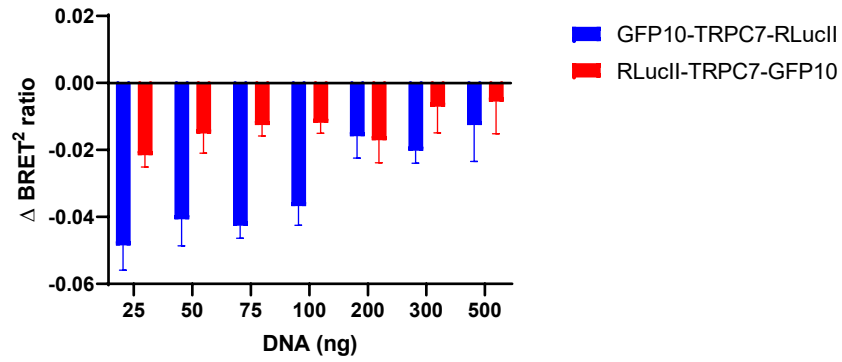

**Figure S1:  $\Delta$ BRET<sup>2</sup> ratio of double-tagged TRPC7 biosensors after  $G\alpha_q$ -DREADD activation by CNO.** HEK293 cells were co-transfected with plasmids encoding RLucII-TRPC7-GFP10 or GFP10-TRPC7-RLucII biosensor and  $G\alpha_q$ -DREADD or co-transfected with an empty vector containing RLucII tag and  $G\alpha_q$ -DREADD. BRET signal was measured after stimulation with 1  $\mu$ M of Clozapine-N-Oxide (CNO) or vehicle as a control. BRET was calculated by subtracting background luminescence of cells only expressing RLucII, approximately 60s after stimulation.

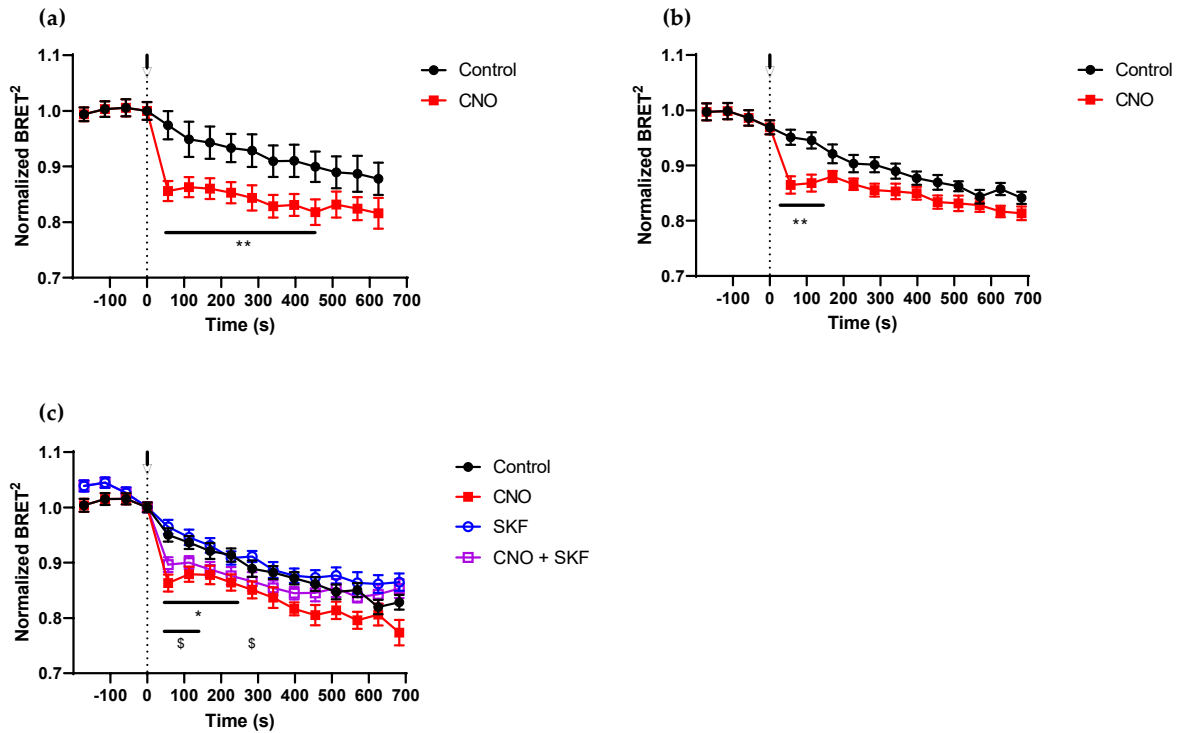

**Figure S2: Modulation of BRET ratio in calcium-free conditions and response to pharmacological calcium entry blockade.** HEK293 cells were co-transfected with plasmids encoding GFP10-TRPC7-RLucII (75 ng), *Gαq*-DREADD (500 ng) and were stimulated with CNO, 1  $\mu$ M or vehicle as a control. The BRET signal was measured for 10 minutes in HBSS buffer containing calcium (a) or in calcium-free HBSS buffer replaced 5 min before acquisition (b). (c) HEK293 cells were transfected in the same conditions as in (a) and were pre-incubated 10 minutes with SKF96365 (SKF; 10  $\mu$ M), a non-selective TRPC channel calcium entry blocker before BRET measurement and stimulation with CNO (1  $\mu$ M) or vehicle as a control. BRET signal was measured for 10 minutes. Each data set represents the mean of three independent experiments, which were each done in triplicate, and expressed as the mean  $\pm$  S.E.M. Statistical analyses were performed using a Two-Way ANOVA with multiple comparisons followed by a Sidak's post-hoc test. \*  $p < 0.05$ , \*\*  $p < 0.01$  for control *vs.* CNO; \$  $p < 0.05$  for SKF *vs.* CNO + SKF.

**Sequence S1:** DNA sequence of GFP10-TRPC7-RlucII biosensor.

ATACCAGGCGTTTCCCCCTGGAAGCTCCCTCGTGCCTCTCTGTTCCGACCCTGCCGCTTACCGGATACCTGTCCGCCTTTCTCCCTT  
CGGGAAGCGTGGCGCTTTCTCAATGCTCACGCTGTAGGTATCTCAGTTCGGTGTAGGTCGTTTCGCTCCAAGCTGGGCTGTGTGCACGAA  
CCCCCGTTTACGCCCCGACCGCTGCGCCTTATCCGGTAACCTATCGTCTTGAGTCCAACCCGGTAAGACACGACTTATCGCCACTGGCAGC  
AGCCACTGGTAACAGGATTAGCAGAGCGAGGTATGTAGGCGGTGCTACAGAGTTCCTGAAGTGGTGGCCTAACTACGGCTACACTAGAA  
GGACAGTATTTGGTATCTGCGCTCTGCTGAAGCCAGTTACCTTCGAAAAAAGAGTTGGTAGCTCTTGATCCGGCAAACAAACCACCGCT  
GGTAGCGGTGGTTTTTTTTGTTTGAAGCAGCAGATTACGCGCAGAAAAAAGGATCTCAAGAAGATCCTTTGATCTTTTCTACGGGGTC  
TGACGCTCAGTGGAACGAAAACTCACGTTAAGGGATTTTGGTCATGAGATTATCAAAAAGGATCTTCACCTAGATCCTTTTAAATTAAA  
AATGAAGTTTTTAAATCAATCTAAAGTATATATGAGTAACTTGGTCTGACAGTTACCAATGCTTAATCAGTGAGGCACCTATCTCAGCG  
ATCTGTCTATTTTCGTTTCATCCATAGTTGCCTGACTCCCCGTCGTGTAGATAACTACGATACGGGAGGGCTTACCATCTGGCCCCAGTGC  
TGCAATGATACCGCGAGACCCACGCTCACCGGCTCCAGATTTATCAGCAATAAACAGCCAGCCGGAAGGGCCGAGCGCAGAAGTGGTC  
CTGCAACTTTATCCGCCTCCATCCAGTCTATTAATTGTTGCCGGGAAGCTAGAGTAAGTAGTTCCGCAGTTAATAGTTTGCGCAACGTT  
GTTGCCATTGCTACAGGCATCGTGGTGTACGCTCGTCTGTTTGGTATGGCTTCATTTCAGCTCCGTTTCCCAACGATCAAGGCGAGTTAC  
ATGATCCCCCATGTTGTGCAAAAAAGCGGTTAGCTCCTTCGGTCTCCGATCGTTGTGAGAAGTAAGTTGGCCGCGAGTGTATCACTCA  
TGGTTATGGCAGCACTGCATAATTCTCTTACTGTCTATGCCATCCGTAAGATGCTTTTCTGTGACTGGTGGTACTCAACCAAGTCATTCT  
TGAGAATAGTGTATGCGCGCAGCCGAGTTGCTCTTGCCCGGCGTCAATACGGGATAATACCGCGCCACATAGCAGAAGTTTAAAGTGCT  
CATCATTGGAAAAAGCTTCTTCGGGGCGAAAACTCTCAAGGATCTTACCGCTGTTGAGATCCAGTTCGATGTAACCCCACTCGTGCACCCA  
ACTGATCTTCAGCATCTTTTACTTTTACCAGCGTTTCTGGGTGAGCAAAAAACAGGAAGGCAAAATGCCGCAAAAAAGGGAATAAGGGCG  
ACACGGAAATGTTGAATACTCATACTCTTCTTTTCAATATTATTGAAGCATTATCAGGGTTATTGTCTCATGAGCGGATACATATT  
TGAATGTATTTAGAAAAATAAACAAATAGGGGTTCCGCGCACATTTCCCCGAAAAGTGCCACCTGACGTCGACGGATCGGGAGATCTCC  
CGATCCCCATGTTGCTGACTCTCAGTACAATCTGCTCTGATGCCGCATAGTTAAGCCAGTATCTGCTCCCTGCTTGTGTGTTGGAGGTGCG  
CTGAGTAGTGCGCGAGCAAAATTTAAGCTACAACAAGGCAAGGCTTGACCGACAATTGCATGAAGAATCTGCTTAGGGTTAGGCGTTTT  
GCGCTGCTTCGCGATGTACGGGCCAGATATACGCGTTGACATTGATTATTGACTAGTTATTAATAGTAATCAATTACGGGGTCATTAGT  
TCATAGCCCATATATGGAGTTCGCGGTTACATAACTACGGTAAATGGCCCGCTGGCTGACCGCCCAACGACCCCCGCCCATTGACGT  
CAATAATGACGTATGTTCCCATAGTAACGCCAATAGGGAAGTTTCCATTGACGTCAATGGGTGGACTATTTACGGTAAACTGCCCACTTG  
GCAGTACATCAAGTGTATCATATGCCAAGTACGCCCTATTGACGTCAATGACGTAATGGCCGCTGGCATTATGCCAGTACAT  
GACCTTATGGGACTTTTCTACTTTGGCAGTACATCTACGTATTAGTCAATCGCTATTACCATGGTGATGCGGTTTTGGCAGTACATCAATG  
GGCGTGATAGCGGTTTTGACTCACGGGGATTTCCAAGTCTCCACCCATTGACGTCAATGGGAGTTTTGTTTTGGCACCAAAATCAACGG  
GACTTTCCAAAATGTGCTAACAACCTCCGCCCCATTGACGCAAAATGGGCGGTAGGCGTGTACGGTGGGAGGTCTATATAAGCAGAGCTCT  
CTGGCTAACTAGAGAACCCACTGCTTACTGGCTTATCGAAATTAATACGACTCACTATAGGGAGACCCAAGCTGGCTAGCCACCATGGT  
GAGCAAGGGCGAGGAGCTGTTTACCGGGGTGGTGGCCATCCTGGTCGAGCTGGACGGCGACGTAAACGGCCACAAGTTTCAGCGTGTCCG  
GCGAGGGCGAGGGCGATGCCACCTACGGCAAGCTGACCCTGAAGTTTCATCTGCACCACCGGCAAGCTGCCCCTGCCCTGGCCACCCCTC  
GTGACCACCTGAGCTACGGCGTGCAGTGCTTCAGCCGCTACCCCGACCACATGAAGCAGCAGCACTTCTTCAAGTCCGCCATGCCCGA  
AGGCTACGTCCAGGAGCGCACCATCTTCTTCAAGGACGACGGCAACTACAAGACCCGCGCCGAGGTGAAGTTCGAGGGCGACACCCTGG  
TGAAGCGCATCGAGCTGAAGGGCATCGACTTCAAGGAGGACGGCAACATCTTGGGGACAAGCTGGAGTACAAGTACAACCCCAACAAC  
GTCTATATCATGGCCGACAAGCAGAAGAACGGCATCAAGGTGAACCTCAAGATCCGCCACAACATCGAGGACGGCAGCGTGCAGCTCGC  
CGACCACTACCAGCAGAACACCCCCATCGGCGACGGCCCCGTGCTGCTGCCGACAACCACTACCTGTTTACCCAGTCCGCCCTGAGCA  
AAGACCCCAACGAGAAGCGCGATCACATGGTCTGCTGGAGTTCGTGACCGCCGCGGGGATCACTCTCGGCATGGACGAGCTGTACAAG  
GGATCCGCGGTTACCATGTTGAGGAACAGCACCTTCAAAAACATGCAGCGCCGGCACACAACGCTGAGGGAGAAGGGCCGTGCCCAGGC  
CATCCGGGGTCCCGCTACATGTTCAACGAGAAGGGCACCACTGCTGACGCCGAGGAGGAGCGCTTCTTGGACTCGGCTGAGTATGGCA  
ACATCCCGGTGGTCCGGAATGCTGGAGGAGTCCAAGACCTTAACCTCAACTGTGTGGACTACATGGGGCAGAACGCTCTGCAGCTG  
GCCGTGGGCAACGAGCACCTAGAGGTACGGAGCTGCTGCTGAAGAAGGAGAACCTGGCACGGGTGGGGGACGCGCTGCTGCTGGCCAT  
CAGCAAGGGCTATGTGCGCATCGTGGAGGCCATCCTCAACCACCCGGCCTTCGCGCAGGGCCAGCGCTGACGCTCAGCCCGCTGGAAC  
AGGAGCTGCGCGACGACGACTTCTATGCCTACGACGAGGACGGCACGCGCTTCTCCACGACATCACGCCCATCATCTGGCGGCGCAC  
TGCCAGGAGTATGAGATCGTGCACATCTGCTGCTCAAGGGCGCCCGCATCGAGCGGCCCCACGACTACTTCTGCAAGTGCAATGAGTG  
CACCAGAAAAACAGCGAAAGACTCCTTCAGCCACTCGCGCTCGCGCATGAACGCCTACAAAGGACTGGCGAGTGCTGCCTACTTGTCCC  
TGTCCAGCGAAGACCCTGTCCTCACCGCCCTGGAGCTCAGCAACGAGTTAGCCAGACTAGCCAACATTGAGACTGAATTTAAGAACGAT  
TACAGGAAGTTATCTATGCAATGCAAGGATTTTGTAGTGGGCGTGTGGACCTGTGCCGAGACACAGAAGAGGTGGAAGCAATTTTAAA  
CGGTGATGTGAACCTTCAAGTCTGGTCCGACCACCACCGTCCAAGTCTGAGCCGGATCAAACCTCGCCATTAAATATGAAGTCAAGAAGT  
TCGTTGCTCATCCTAACTGTGAGCAGCAATTGCTTACCATGTGGTATGAAAATCTCTCAGGCTTACGTCAACAGTCTATCGCTGTGAAA  
TTCCTGGCTGTCTTTGGAGTCTCCATAGGCCTCCCTTTTCTCGCCATAGCCTATTGGATTGCTCCGTGCAGCAAGCTAGGACGAACCCCT  
GAGGAGCCCTTTTCATGAAGTTTGTAGCTCATGCAGTTTCTTTTACAATCTTCTTGGGATTATTAGTTGTGAATGCATCTGACCGATTTG  
AAGGTGTTAAACCCCTGCCAAACGAAACCTTCACAGACTACCCAAAACAAATCTTCAGAGTGAAGAACACACAGTTCTCTGGACAGAA  
ATGCTCATTATGAAGTGGGTCTTAGGAATGATTTGGTCCGAATGCAAGGAATCTGGGAGGAGGGGCCACGGGAGTACGTGCTGCACCTT  
GTGGAACCTGTAGATTTTCGGAGTGTGTCCATCTTCGTGGCCTCCTTCACAGCAGCTTCATGGCCTTCTGAAGGCCACGGAGGCAC  
AGCTGTACGTGGACGACGACGTCAGGACGACGCTGCACAATGTCTCGCTTCCGCGGAAGTGGCATACTTTCACCTACGCCAGGGAC  
AAGTGGTGGCCTTCAGACCCTCAGATCATATCGGAAGGGCTCTACGCGATAGCCGTCGTGCTGAGCTTCTCTCGCATTGCATACATTCT  
GCCAGCCAACGAGAGTTTTGGGGCCCTGCAGATCTCGCTAGGGAGAAGTGTGAAAGATATCTTCAAGTTTCATGGTCATTTTTCATCATGG  
TATTTGTGGCCTTCATGATTGGGATGTTCAACCTGTACTCTTACTACCGAGGTGCCAAATACAACCCAGCGTTTACAACGGTTGAAGAA

AGTTTTAAACTTTGTTTTGGTCCATATTTCGGCTTATCTGAAGTAATCTCAGTGGTGCTGAAATACGACCACAAATTCATCGAGAACAT  
TGGCTACGTTCTCTACGGCGTTTATAACGTCACCATGGTGGTAGTGTTGCTCAACATGCTAATAGCCATGATAAAACAACCTCCTATCAGG  
AAATTGAGGAGGATGCAGATGTGGAATGGAAGTTCGCCCCGAGCAAACTCTGGCTGTCTTACTTTTGATGAAGGAAGAACTCTACCTGCT  
CCTTTTAATCTAGTGCCAAGTCCTAAATCATTTTATTATCTCATAATGAGAATCAAGATGTGCCTCATAAACTCTGCAAATCTAAGGC  
CAAAAGCTGTGAAAATGACCTTGAAATGGGCATGCTGAATTCCAAATTCAGAAGACTCGCTACCAGGCTGGCATGAGGAATTCTGAAA  
ATCTGACAGCAAATAACACTTTGAGCAAGCCCACCAGATACCAGAAAATCATGAAACGGCTCATAAAAAGATACGTCCTGAAAGCCCAG  
GTGGACAGAGAAAAATGACGAAGTCAATGAAGGCGAGCTGAAGGAAATCAAGCAAGATATCTCCAGCCTGCGCTATGAGCTTCTTGAGGA  
AAAATCTCAAGCTACTGGTGAGCTGGCAGACCTGATTCAACAACCTCAGCGAGAAGTTTGGAAGAAGCTTAAACAAAGACCACCTGAGGG  
TGAACAAGGGCAAAGACATTAAGCTTCCCGCCACCATGACCAGCAAGGTGTACGACCCCGAGCAGAGGAAGAGGATGATCACCAGCCCC  
CAGTGGTGGGCCAGGTGCAAGCAGATGAACGTGCTGGACAGCTTCATCAACTACTACGACAGCGAGAAGCACGCCGAGAACGCCGTGAT  
CTTCCTGCACGGCAACGCCACTAGCAGCTACCTGTGGAGGCACGTGGTGCCCCACATCGAGCCCGTGGCCAGGTGCATCATCCCCGATC  
TGATCGGCATGGGCAAGAGCGGCAAGAGCGGCAACGGCAGCTACAGGCTGCTGGACCACTACAAGTACCTGACCGCCTGGTTCGAGCTC  
CTGAACCTGCCCAAGAAGATCATCTTCGTGGGCCACGACTGGGGCGCCGCCCTGGCCTTCCACTACAGCTACGAGCACCAGGACAAGAT  
CAAGGCCATCGTGCACGCCGAGAGCGTGGTGGACGTGATCGAGAGCTGGGACGAGTGGCCAGACATCGAGGAGGACATCGCCCTGATCA  
AGAGCGAGGAGGGCGAGAAGATGGTGTGGAGAACAACCTTCTTCGTGGAGACCGTGTGCCCCAGCAAGATCATGAGAAAGCTGGAGCCC  
GAGGAGTTCCGCCCTACCTGGAGCCCTTCAAGGAGAAGGGCGAGGTGAGAAGACCCACCCTGAGCTGGCCAGAGAGATCCCCCTGGT  
GAAGGGCGGCAAGCCCCGACGTGGTGCAGATCGTGAGAAACTACAACGCCTACCTGAGAGCCAGCGACGACCTGCCCAAGATGTTTCATCG  
AGAGCGACCCCGCTTCTTCAGCAACGCCATCGTGGAGGGCGCCAAGAAGTTCCCCAACACCGAGTTTCGTGAAGGTGAAGGGCCTGCAC  
TTCAGCCAGGAGGACGCCCCGACGAGATGGGCAAGTACATCAAGAGCTTCGTGGAGAGAGTGTGAAGAACGAGCAGTAAGAATTCTC  
TAGAGGGCCCCGTTTAAACCCGCTGATCAGCCTCGACTGTGCCTTCTAGTTGCCAGCCATCTGTTGTTTGGCCCTCCCCCGTGCCTTCTC  
TGACCCTGGAAGGTGCCACTCCCCTGTCTTTTCTTAATAAAATGAGGAAATTGCATCGCATTGTCTGAGTAGGTGTCATTCTATTCTG  
GGGGGTGGGGTGGGGCAGGACAGCAAGGGGGAGGATTGGGAAGACAATAGCAGGCATGCTGGGGATGCGGTGGGCTCTATGGCTTCTGA  
GGCGGAAAGAACCAGCTGGGGCTCTAGGGGGTATCCCCACGCGCCCTGTAGCGGCGCATTAAGCGCGGGCGGGTGTGGTGGTTACGCGCA  
GCGTGACCGCTACACTTGCCAGCGCCCTAGCGCCCGCTCCTTTTCGCTTTCTTCCCTTCTTCTCGCCACGTTTCGCCGGCTTTCCCCGT  
CAAGCTCTAAATCGGGGCATCCCTTTAGGGTTCGATTTAGTGCTTTACGGCACCTCGACCCCAAAAACTTGATTAGGGTGATGGTTT  
ACGTAGTGGGCCATCGCCCTGATAGACGGTTTTTCGCCCTTTGACGTTGGAGTCCACGTTCTTTAATAGTGAGCTCTTGTTCCAAACG  
GAACAACACTCAACCCTATCTCGGTCTATTCTTTTGATTTATAAGGGATTTTGGGGATTTTCGGCCTATTGGTTAAAAAATGAGCTGATT  
TAACAAAAATTTAACGCGAATTAATTCTGTGGAATGTGTGTGAGTTAGGGTGTGGAAAGTCCCCAGGCTCCCCAGGCAGGCAGAAGTAT  
GCAAAGCATGCATCTCAATTAGTCAGCAACCAGGTGTGGAAAGTCCCCAGGCTCCCCAGCAGGCAGAAGTATGCAAAGCATGCATCTCA  
ATTAGTCAGCAACCATAGTCCCCGCCCTAACTCCGCCCATCCCGCCCTAACTCCGCCCAGTTCCGCCCATTTCTCCGCCCATGGCTGA  
CTAATTTTTTTTTTATTTATGAGAGGCCGAGGCCGCTCTGCCTCTGAGCTATTCCAGAAGTAGTGAGGAGGCTTTTTTGGAGGCCTAGG  
CTTTTGCAAAAAGCTCCCGGGAGCTTGTATATCCATTTTCGGATCTGATCAGCACGTGTTGACAATTAATCATCGGCATAGTATATCGG  
CATAGTATAATACGACAAGGTGAGGAATAAACCATGGCCAAGTTGACCAGTGCCGTTCCGGTGCTCACCGCGCGCGACGTGCGCGGAG  
CGGTGAGTTCTGGACCGACCGGCTCGGGTTCTCCCGGGACTTCGTGGAGGACGACTTCGCCGGTGTGGTCCGGGACGACGTGACCCGT  
TTCATCAGCGCGGTCCAGGACAGGTGGTGCCGACAACACCTGGCCTGGGTGTGGGTGCGCGGCCTGGACGAGCTGTACGCCGAGTG  
GTCGGAGGTGCTGTCCACGAACCTCCGGGACGCTCCGGGCCGCCATGACCGAGATCGGCGAGCAGCCGTGGGGGCGGGAGTTTCGCC  
TGCGCGACCCGGCCGCAACTGCGTGCACTTCGTGGCCGAGGAGCAGGACTGACACGTGCTACGAGATTTGATTCCACCGCCGCTTC  
TATGAAAGGTTGGGCTTCGGAATCGTTTTCCGGGACGCCGGCTGGATGATCCTCCAGCGCGGGGATCTCATGCTGGAGTTCTTCGCCCA  
CCCCAATTGTTTATTGACGCTTATAATGGTTACAAATAAAGCAATAGCATCACAAATTTACAAATAAAGCATTTTTTTTTACTGCATT  
CTAGTTGTGGTTTGTCCAAACTCATCAATGTATCTTATCATGTCTGTATACCGTCGACCTCTAGCTAGAGCTTGGCGTAATCATGGTCA  
TAGCTGTTTCTGTGTGAAATTGTTATCCGCTCACAATTCCACACAACATACGAGCCGGAAGCATAAAGTGTAAGCCTGGGGTGCCTA  
ATGAGTGAGCTAACTCACATTAATTGCGTTGCGCTCACTGCCCCGCTTTCCAGTCGGGAAACCTGTGCTGCCAGCTGCATTAATGAATCG  
GCCAACGCGCGGGGAGAGGCGGTTTGCATATTGGGCGCTCTTCGCTTCCTCGCTCACTGACTCGCTGCGCTCGGTGCTTCGGCTGCGG  
CGAGCGGTATCAGCTCACTCAAAGGCGGTAATACGGTTATCCACAGAATCAGGGGATAACGCAGGAAAGAACATGTGAGCAAAAGGCCA  
GCAAAAGGCCAGGAACCGTAAAAAGGCCGCTTGTGCGGTTTTTCCATAGGCTCCGCCCCCTGACGAGCATCACAAAAATCGACGCT  
CAAGTCAGAGGTGGCGAAACCCGACAGGACTATAAAG

**Sequence S2:** DNA sequence of RlucII-TRPC7-GFP10 biosensor.

CTTATCCGGTAAGTATCGTCTTGAGTCCAACCCGGTAAGACACGACTTATCGCCACTGGCAGCAGCCACTGGTAACAGGATTAGCAGAG  
CGAGGTATGTAGGCGGTGCTACAGAGTTCTTGAAGTGGTGGCCTAACTACGGCTACACTAGAAGGACAGTATTTGGTATCTGCGCTCTG  
CTGAAGCCAGTTACCTTCGGAAAAAGAGTTGGTAGCTCTTGATCCGGCAAACAAACCACCGCTGGTAGCGGTGGTTTTTTTGTGTGCAA  
GCAGCAGATTACGCGCAGAAAAAAGGATCTCAAGAAGATCCTTTGATCTTTT  
CTACGGGGTCTGACGCTCAGTGGAAACGAAAACCTCACGTTAAGGGATTTTGGTCTATGAGATTATCAAAAAGGATCTTACCTAGATCCTT  
TTAAATTAAAAATGAAGTTTTAAATCAATCTAAAGTATATATGAGTAAACTTGGTCTGACAGTTACCAATGCTTAATCAGTGAGGCACC  
TATCTCAGCGATCTGTCTATTTTCGTTTCATCCATAGTTGCCTGACTCCCCGTCGTGTAGATAACTACGATACGGGAGGGCTTACCATCTG  
GCCCCAGTGTGCAATGATACCGCGAGACCCACGCTCACCGGCTCCAGATTTATCAGCAATAAACAGCCAGCCGGAAGGGCCGAGCGC  
AGAAGTGGTCTGCAACTTTATCCGCCTCCATCCAGTCTATTAATTGTTGCCGGGAAGCTAGAGTAAGTAGTTCCGCGATTAAATAGTTT  
GCGCAACGTTGTTGCCATTGCTACAGGCATCGTGGTGTACGCTCGTCTTGGTATGGCTTCATTACGCTCCGTTCCCAACGATCAA  
GGCGAGTTACATGATCCCCCATGTTGTGCAAAAAGCGGTTAGCTCCTTCGGTCTCCGATCGTTGTGAGAAGTAAGTTGGCCGCGAGTG  
TTATCACTCATGGTTATGGCAGCACTGCATAATTCTCTTACTGTCTATGCCATCCGTAAGATGCTTTTCTGTGACTGGTGAGTACTCAAC  
CAAGTCATTCTGAGAATAGTGTATGCGGCGACCGAGTTGCTCTTGCCCGGCGTCAATACGGGATAATACCGCGCCACATAGCAGAACTT  
TAAAAGTGCTCATCTATTGGAACGTTCTTTCGGGGCGAAAACCTCAAGGATCTTACCGCTGTTGAGATCCAGTTTCGATGTAACCCACT  
CGTGCACCCAAGTATCTTACGATCTTTTACTTTTACCAGCGTTTCTGGGTGAGCAAAAACAGGAAGGCAAAATGCCGCAAAAAGGG  
AATAAGGGCGACACGGAAATGTTGAATACTCATACTCTTCTTTTTCAATATTATTGAAGCATTTATCAGGGTTATTGTCTCATGAGCG  
GATACATATTTGAATGTATTTAGAAAAATAAACAAATAGGGGTTCCGCGCACATTTCCCCGAAAAGTGCCACCTGACGTGACGCGATCG  
GGAGATCTCCCGATCCCTATGGTTCGACTCTCAGTACAATCTGCTCTGATGCCGCATAGTTAAGCCAGTATCTGCTCCCTGCTTGTGTG  
TTGGAGGTGCTGAGTAGTGCGCGAGCAAAATTTAAGCTACAACAAGGCAAGGCTTGACCGACAATTGCATGAAGAATCTGCTTAGGGT  
TAGGCGTTTTTGCCTGCTTCGCGATGTACGGGCCAGATATACGCGTTGACATTGATTATTGACTAGTTATTAATAGTAATCAATTACGG  
GGTCATTAGTTTCATAGCCCATATATGGAGTTCCGCGTTACATAACTTACGGTAAATGGCCCGCTGGCTGACCGCCCAACGACCCCCGC  
CCATTGACGTCAATAATGACGTATGTTCCCATAGTAACGCCAATAGGGACTTTCCATTGACGTCAATGGGTGGACTATTTACGGTAAAC  
TGCCCACTTGGCAGTACATCAAGTGTATCATATGCCAAGTACGCCCCCTATTGACGTCAATGACGGTAAATGGCCCGCTGGCATTATG  
CCCAGTACATGACCTTATGGGACTTTCTTACTTGGCAGTACATCTACGTATTAGTCATCGCTATTACCATGGTGTATGCGGTTTTTGGCAG  
TACATCAATGGGCGTGGATAGCGGTTTGACTCACGGGGATTTCCAAGTCTCCACCCCATTTGACGTCAATGGGAGTTTGTTTTTGGCACCA  
AAATCAACGGGACTTTCCAAAATGTCGTAACAACCTCCGCCCCATTGACGCAAAATGGGCGGTAGGCGTGTACGGTGGGAGGTCTATATAA  
GCAGAGCTCTCTGGCTAACTAGAGAACCCACTGCTTACTGGCTTATCGAAATTAATACGACTCACTATAGGGAGACCCAAGCTGGCTAG  
CCACCATGACCAGCAAGGTGTACGACCCCGAGCAGAGGAAGAGGATGATCACCGGCCCCCAGTGGTGGGCCAGGTGCAAGCAGATGAAC  
GTGCTGGACAGCTTCATCAACTACTACGACAGCGAGAAGCAGCCGAGAACGCCGTGATCTTCTGACAGGCAACGCCACTAGCAGCTA  
CCTGTGGAGGCAGTGGTGGCCACATCGAGCCCGTGGCCAGGTGCATCATCCCCGATCTGATCGGCATGGGCAAGAGCGGCAAGAGCG  
GCAACGGCAGCTACAGGCTGCTGGACCACTACAAGTACCTGACCGCCTGGTTTCGAGCTCCTGAACCTGCCCAAGAAGATCATCTTCGTG  
GGCCACGACTGGGGCGCCGCCCTGGCCTTCCACTACAGCTACGAGCACCAGGACAAGATCAAGGCCATCGTGCACGCCGAGAGCGTGGT  
GGACGTGATCGAGAGCTGGGACGAGTGGCCAGACATCGAGGAGGACATCGCCCTGATCAAGAGCGAGGAGGGCGAGAAGATGGTGTCTGG  
AGAACAATCTTCTTGGAGACCGTGTGCCCCAGCAAGATCATGAGAAAGCTGGAGCCCGAGGAGTTTCGCCCTACCTGGAGCCCTTC  
AAGGAGAAGGGCGAGGTGAGAAGACCCACCCTGAGCTGGCCAGAGAGATCCCCCTGGTGAAGGGCGGCAAGCCCGACCTGGTGGTGCAGAT  
CGTGAGAACTACAACGCCTACCTGAGAGCCAGCGACGACCTGCCCAAGATGTTTCATCGAGAGCGACCCCGGCTTCTTCAGCAACGCCA  
TCGTGGAGGGCGCCAAGAAGTTCCCCAACACCGAGTTTCGTGAAGGTGAAGGGCCTGCACTTCAGCCAGGAGGACGCCCCCGACGAGATG  
GGCAAGTACATCAAGAGCTTCGTGGAGAGAGTGTGAAGAACGAGCAGGGATCCGCCGGTACCATGTTGAGGAACAGCACCTTCAAAAA  
CATGCAGCGCCGGCACACAACGCTGAGGGAGAAGGGCCGTGCGCAGGCCATCCGGGGTCCCGCCTACATGTTCAACGAGAAGGGCACCA  
GTCTGACGCCCCGAGGAGGAGCGCTTCTGGACTCGGCTGAGTATGGCAACATCCCGGTGGTCCGGAAGATGCTGGAGGAGTCCAAGACC  
CTTAACCTCAACTGTGTGGACTACATGGGGCAGAACGCTCTGCAGCTGGCCGTGGGCAACGAGCACCTAGAGGTACGGAGCTGCTGCT  
GAAGAAGGAGAACCTGGCACGGGTGGGGGACGCGCTGCTGCTGGCCATCAGCAAGGGCTATGTGCGCATCGTGGAGGCCATCCTCAACC  
ACCCGGCCTTCGCGCAGGGCCAGCGCCTGACGCTCAGCCCGCTGGAACAGGAGCTGCGCGACGACGACTTCTATGCCTACGACGAGGAC  
GGCACGCGCTTCTCCACGACATCAGCCCCATCCTTGGCGGCGCACTGCCAGGAGTATGAGATCGTGCACATCCTGCTGCTCAAGGG  
CGCCCGCATCGAGCGGCCCCACGACTACTTCTGCAAGTGCAATGAGTGCACCAGAGAAACAGCGGAAAGACTCCTTCAGCCACTCGCGCT  
CGCGCATGAACGCCTACAAAGGACTGGCGAGTGTGCTTACTTGTCCCTGTCCAGCGAAGACCCTGTCTCACCGCCCTGGAGCTCAGC  
AACGAGTTAGCCAGACTAGCCAACATTGAGACTGAATTTAAGAACGATTACAGGAAGTTATCTATGCAATGCAAGGATTTTGTAGTGGG  
CGTGCTGGACCTGTGCCGAGACACAGAAGAGGTGGAAGCAATTTTAAACGGTGATGTGAACCTTCAAGTCTGGTCCGACCACCACCGTC  
CAAGTCTGAGCCGATCAAACCTCGCCATTAAATATGAAGTCAAGAAGTTCTGTTGCTCATCCTAACTGTGAGCAGCAATTGCTTACCATG  
TGGTATGAAAATCTCTCAGGCTTACGTCAACAGTCTATCGCTGTGAAATTCCTGGCTGTCTTTGGAGTCTCCATAGGCCTCCCTTTTCT  
CGCCATAGCCTATTGGATTGCTCCGTGCAGCAAGCTAGGACGAACCCCTGAGGAGCCCTTTTCATGAAGTTTGTAGCTCATGCAGTTTCTT  
TTACAATCTTCTTGGGATTATTAGTTGTGAATGCATCTGACCGATTGTAAGGTGTTAAACCCCTGCCAAACGAAACCTTCACAGACTAC  
CCAAAACAAATCTTCAGAGTGAAGAACACAGTCTCTCTGGACAGAAATGCTCATTATGAAGTGGGTCTTAGGAATGATTTGGTCCGA  
ATGCAAGGAAATCTGGGAGGAGGGCCACGGGAGTACGTGCTGCACTTGTGGAACCTGCTAGATTTTCGGGATGCTGCTCCATCTTCTGTG  
CCTCCTTCACAGCACGCTTCATGGCCTTCTGAAAGGCCACGGAGGCACAGCTGTACGTGGACAGCACGTGCAGGACGACACGCTGCAC  
AATGTCTCGCTTCCGCCGGAAGTGGCATACTTCACCTACGCCAGGGACAAGTGGTGGCCTTCAGACCCTCAGATCATATCGGAAGGGCT  
CTACGCGATAGCCGTGCTGCTGAGCTTCTCTCGCATTGCATACATTCTGCCAGCCAACGAGAGTTTTGGGCCCTGCAGATCTCGCTAG  
GGAGAATGTGAAAGATATCTTCAAGTTCATGGTCATTTTCATCATGGTATTTGTGGCCTTCATGATTGGGATGTTCAACCTGTACTCT



TACTACCGAGGTGCCAAATACAACCCAGCGTTTACAACGGTTGAAGAAAGTTTTAAACTTTGTTTTGGTCCATATTCGGCTTATCTGA  
AGTAATCTCAGTGGTGCTGAAATACGACCACAAATTCATCGAGAACATTGGCTACGTTCTCTACGGCGTTTATAACGTCACCATGGTG  
TAGTGTTGCTCAACATGCTAATAGCCATGATAAACTCCTATCAGGAAATTGAGGAGGATGCAGATGTGGAATGGAAGTTCGCCCCGA  
GCAAACTCTGGCTGTCTTACTTTGATGAAGGAAGAACTCTACCTGCTCCTTTTAACTTAGTGCCAAGTCCTAAATCATTTTATTATCT  
CATAATGAGAATCAAGATGTGCCTCATAAACTCTGCAAATCTAAGGCCAAAAGCTGTGAAAATGACCTTGAAATGGGCATGTGAATT  
CCAAATTCAAGAAGACTCGCTACCAAGGCTGGCATGAGGAATTCTGAAAATCTGACAGCAAATAACACTTTGAGCAAGCCCACCAGATAC  
CAGAAAATCATGAAACGGCTCATAAAAAGATACGTCCTGAAAGCCCAGGTGGACAGAGAAAATGACGAAGTCAATGAAGGCGAGCTGAA  
GGAAATCAAGCAAGATATCTCCAGCCTGCGCTATGAGCTTCTTGAGGAAAAATCTCAAGCTACTGGTGAGCTGGCAGACCTGATTCAAC  
AACTCAGCGAGAAGTTTGAAAGAAGCTTAAACAAAGACCACCTGAGGGTGAACAAGGGCAAAGACATTAAGCTTCCCGCCACCATGGTG  
AGCAAGGGCGAGGAGCTGTTACCGGGGTGGTGCCCATCTGGTTCGAGCTGGACGGCGACGTAAACGGCCACAAGTTTCAGCGTGTCCGG  
CGAGGGCGAGGGCGATGCCACCTACGGCAAGCTGACCCTGAAGTTCATCTGCACCACCGGCAAGCTGCCCCTGCCCACCCCTCG  
TGACCACCTGAGCTACGGCGTGCAGTGCTTCAGCCGCTACCCCGACCACATGAAGCAGCACGACTTCTTCAAGTCCGCCATGCCCGAA  
GGCTACGTCCAGGAGCGCACCATCTTCTTCAAGGACGACGGCAACTACAAGACCCGCGCCGAGGTGAAGTTCGAGGGCGACACCCTGGT  
GAACCGCATCGAGCTGAAGGGCATCGACTTCAAGGAGGACGGCAACATCTGGGGCACAAGCTGGAGTACAACCTACAACCCCCACAACG  
TCTATATCATGGCCGACAAGCAGAAGAACGGCATCAAGGTGAACCTCAAGATCCGCCACAACATCGAGGACGGCAGCGTGCAGCTCGCC  
GACCACTACCAGCAGAACACCCCCATCGGCGACGGCCCCGTGCTGCTGCCGACAACCACTACCTGTTTACCCAGTCCGCCCTGAGCAA  
AGACCCCAACGAGAAGCGCGATCACATGGTCCTGCTGGAGTTCGTGACCGCCGCGGGATCACTCTCGGCATGGACGAGCTGTACAAGT  
GGAGCCACCCGAGTTCGAAAAATAACTCGAGTCTAGAGGGCCCCGTTTAAACCCGCTGATCAGCCTCGACTGTGCCTTCTAGTTGCCAG  
CCATCTGTTGTTTGGCCCTCCCCCGTGCCTTTCCTTGACCCTGGAAGGTGCCACTCCCCTGTCTTTTCTTAATAAAATGAGGAAATTGC  
ATCGCATTGTCTGAGTAGGTGTCAATTCTATTCTGGGGGGTGGGGTGGGGCAGGACAGCAAGGGGGAGGATTGGGAAGACAATAGCAGGC  
ATGCTGGGGATGCGGTGGGCTCTATGGCTTCTGAGGCGAAAGAACCAGCTGGGGCTCTAGGGGGTATCCCCACGCGCCCTGTAGCGGC  
GCATTAAGCGCGGCGGGTGTGGTGGTTACGCGCAGCGTGACCGCTACACTTGCCAGCGCCCTAGCGCCCGCTCCTTTTCGCTTTCTTCCC  
TTCCTTTCTCGCCACGTTTCGCCGGCTTTCCCCGTCAAGCTCTAAATCGGGGCATCCCTTTAGGGTTCGGATTTAGTGCTTTACGGCACC  
TCGACCCCCAAAAAATTGATTAGGGTGATGGTTCACGTAGTGGGCCATCGCCCTGATAGACGGTTTTTTCGCCCTTTGACGTTGGAGTCC  
ACGTTCTTTAATAGTGGACTCTTGTTCAAACTGGAACAACACTCAACCCTATCTCGGTCTATTCTTTTATTATTAAGGGATTTTGGG  
GATTTTCGGCCTATTGGTTAAAAAATGAGCTGATTTAACAATAAATTAACGCGAATTAATTCTGTGGAATGTGTGTGCTAGTTAGGGTGTGG  
AAAGTCCCCAGGCTCCCCAGGCAGGCAGAAGTATGCAAAGCATGCATCTCAATTAGTCAGCAACCAGGTGTGGAAAGTCCCCAGGCTCC  
CCAGCAGGCAGAAGTATGCAAAGCATGCATCTCAATTAGTCAGCAACCATAGTCCCGCCCCCTAACTCCGCCCATCCCGCCCCCTAACTCC  
GCCCAGTTCGCCCATTTCTCCGCCCATGGCTGACTAATTTTTTTTTTATTTATGCAGAGGCCGAGGCCGCTCTGCCTCTGAGCTATTCC  
AGAAGTAGTGAGGAGGCTTTTTTGGAGGCCTAGGCTTTTGCAAAAAGCTCCCGGGAGCTTGTATATCCATTTTCGGATCTGATCAGCAC  
GTGTTGACAATTAATCATCGGCATAGTATATCGGCATAGTATAATACGACAAGGTGAGGAATAAACCATGGCCAAGTTGACCAGTGCC  
GTTCCGGTGCTCACCGCGCGACGTGCGCGGAGCGGTGAGTTCTGGACCGACCGGCTCGGGTTCTCCCGGGACTTCGTGGAGGACGA  
CTTCGCCGGTGTGGTCCGGGACGACGTGACCCTGTTTCATCAGCGCGGTCCAGGACCAGGTGGTGCCGGACAACACCCTGGCCTGGGTGT  
GGGTGCGCGGCCTGGACGAGCTGTACGCCGAGTGGTTCGGAGGTGCTGTCCACGAACCTCCGGGACGCCTCCGGGCGGGCCATGACCGAG  
ATCGGCGAGCAGCGGTGGGGGCGGGAGTTCCGCCCTGCGCGACCCGGCGGCAACTGCGTGCACCTTCGTGGCCGAGGAGCAGGACTGACA  
CGTGCTACGAGATTTTCGATTCCACCGCCGCTTCTATGAAAGGTTGGGCTTCGGAATCGTTTTTCCGGGACGCCGGCTGGATGATCCTCC  
AGCGCGGGGATCTCATGCTGGAGTTCTTCGCCACCCCAACTTGTTTATTGCAGCTTATAATGGTTACAAATAAAGCAATAGCATCACA  
AATTTACAAATAAAGCATTTTTTTTCACTGCATTCTAGTTGTGGTTTGTCCAACTCATCAATGTATCTTATCATGTCTGTATACCGTC  
GACCTCTAGCTAGAGCTTGGCGTAATCATGGTTCATAGCTGTTTCTGTGTGAAATTGTTATCCGCTCACAATTCCACACAACATACGAG  
CCGGAAGCATAAAGTGTAAGCCTGGGGTGCCTAATGAGTGAGCTAACTCACATTAATTGCGTTGCGCTCACTGCCCCGCTTTCCAGTCG  
GGAAACCTGTGTCGTCAGCTGCATTAATGAATCGGCCAACGCGCGGGGAGAGGCGGTTTTCGTATTGGGCGCTCTTCCGCTTCTCTGCT  
CACTGACTCGCTGCGCTCGGTGCTTTCGGCTGCGGCGAGCGGTATCAGCTCACTCAAAGGCGGTAATACGGTTATCCACAGAATCAGGGG  
ATAACGCAGGAAAGAATGTGAGCAAAAGGCCAGCAAAAGGCCAGGAACCGTAAAAAGGCCGCGTTGCTGGCGTTTTTCCATAGGCTC  
CGCCCCCTGACGAGCATCACAAAAATCGACGCTCAAGTCAGAGGTGGCGAAACCCGACAGGACTATAAAGATACCAGGCGTTTTCCCC  
TGGAAGCTCCCTCGTGCGCTCTCTGTTCCGACCTGCCGCTTACCGGATACCTGTCCGCCTTTCTCCCTTCGGGAAGCGTGGCGCTTT  
CTCAATGCTCAGCTGTAGGTATCTCAGTTCGGTGTAGGTGCTTCGCTCCAAGCTGGGCTGTGTGCACGAACCCCCCGTTTCAGCCCGAC  
CGCTGCGC
